# Supplementary figures and images for: Effect of short-term moderate intake of ice wine on hepatic glycolipid metabolism in C57BL/6J mice
Source: Royal Society of Chemistry journal article supplement (doi:10.1039/d3fo05665a), 2024-01-01

# ChREBP- $\beta$

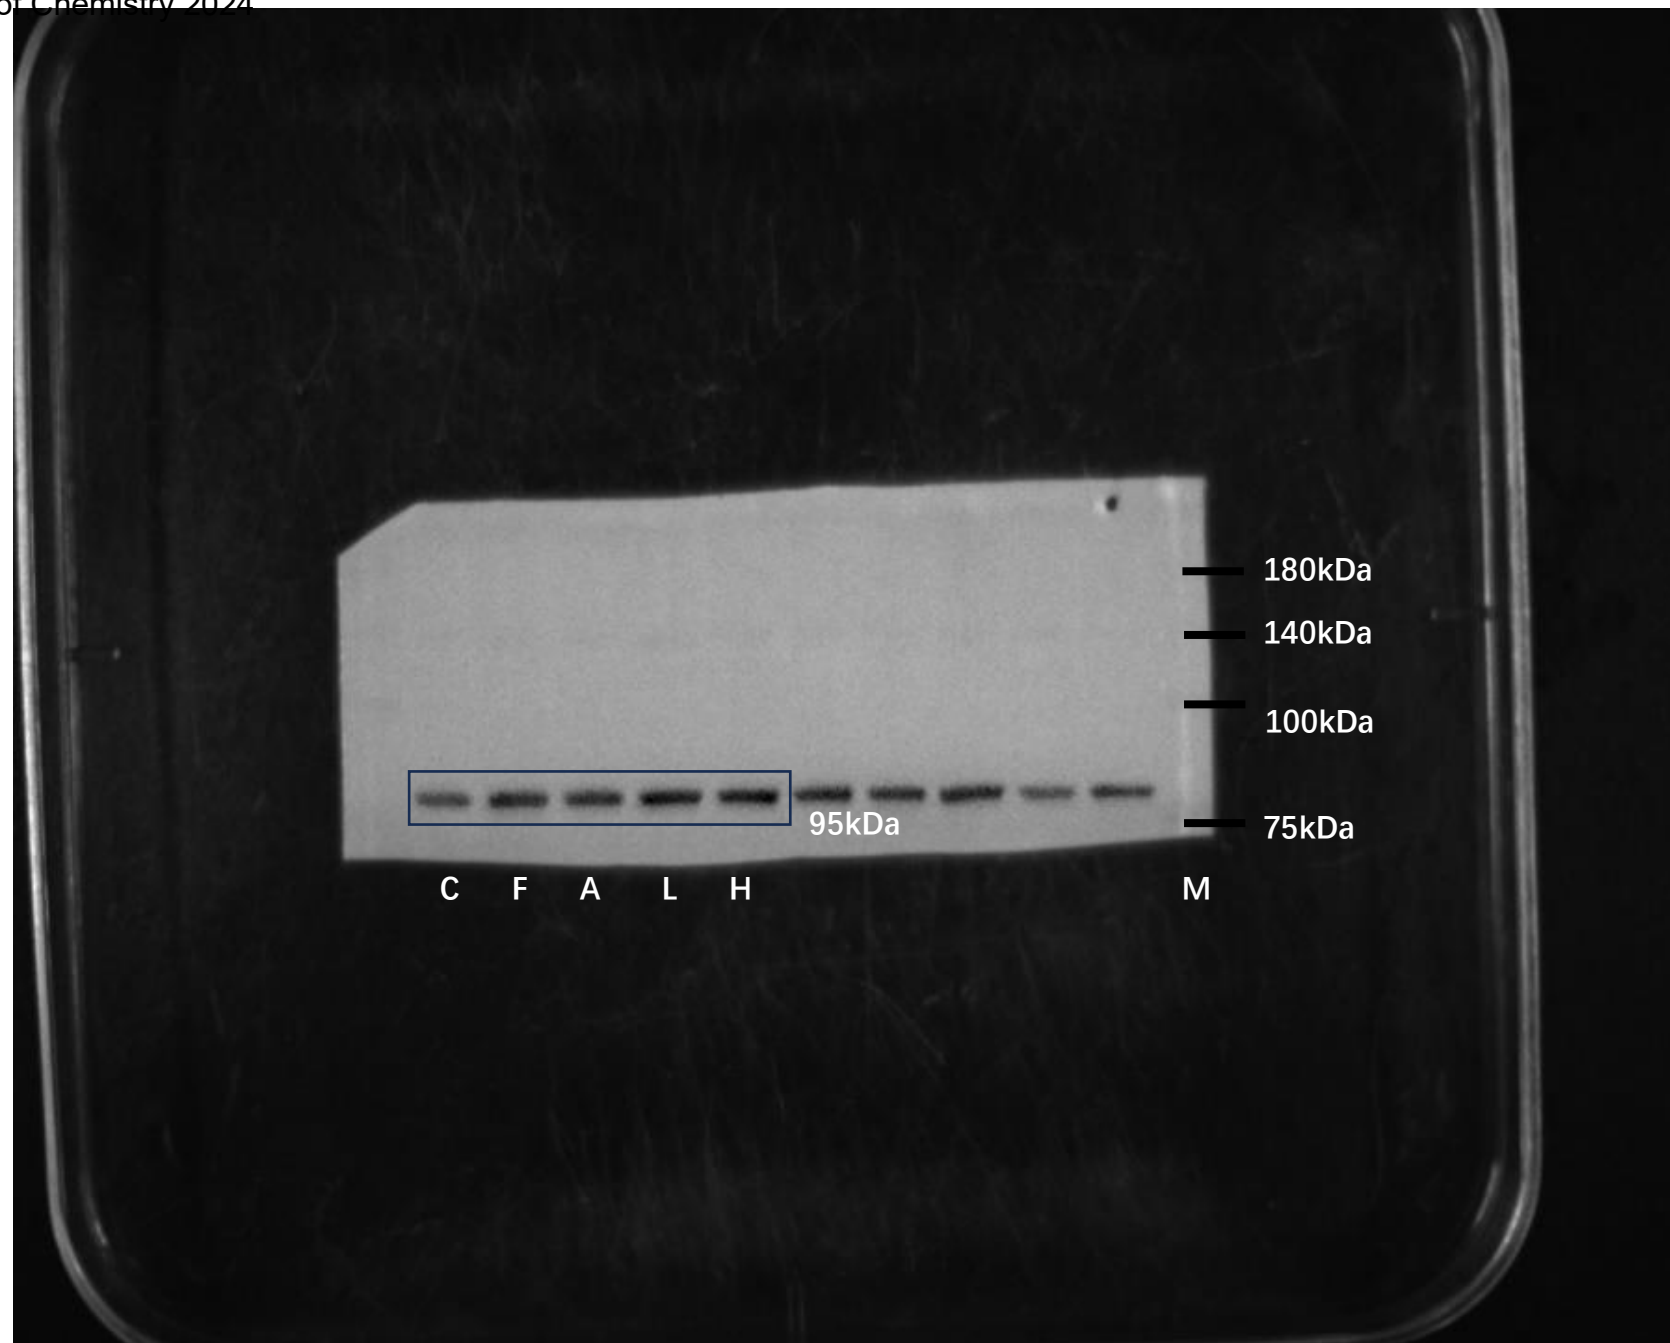

# SREBP-1c

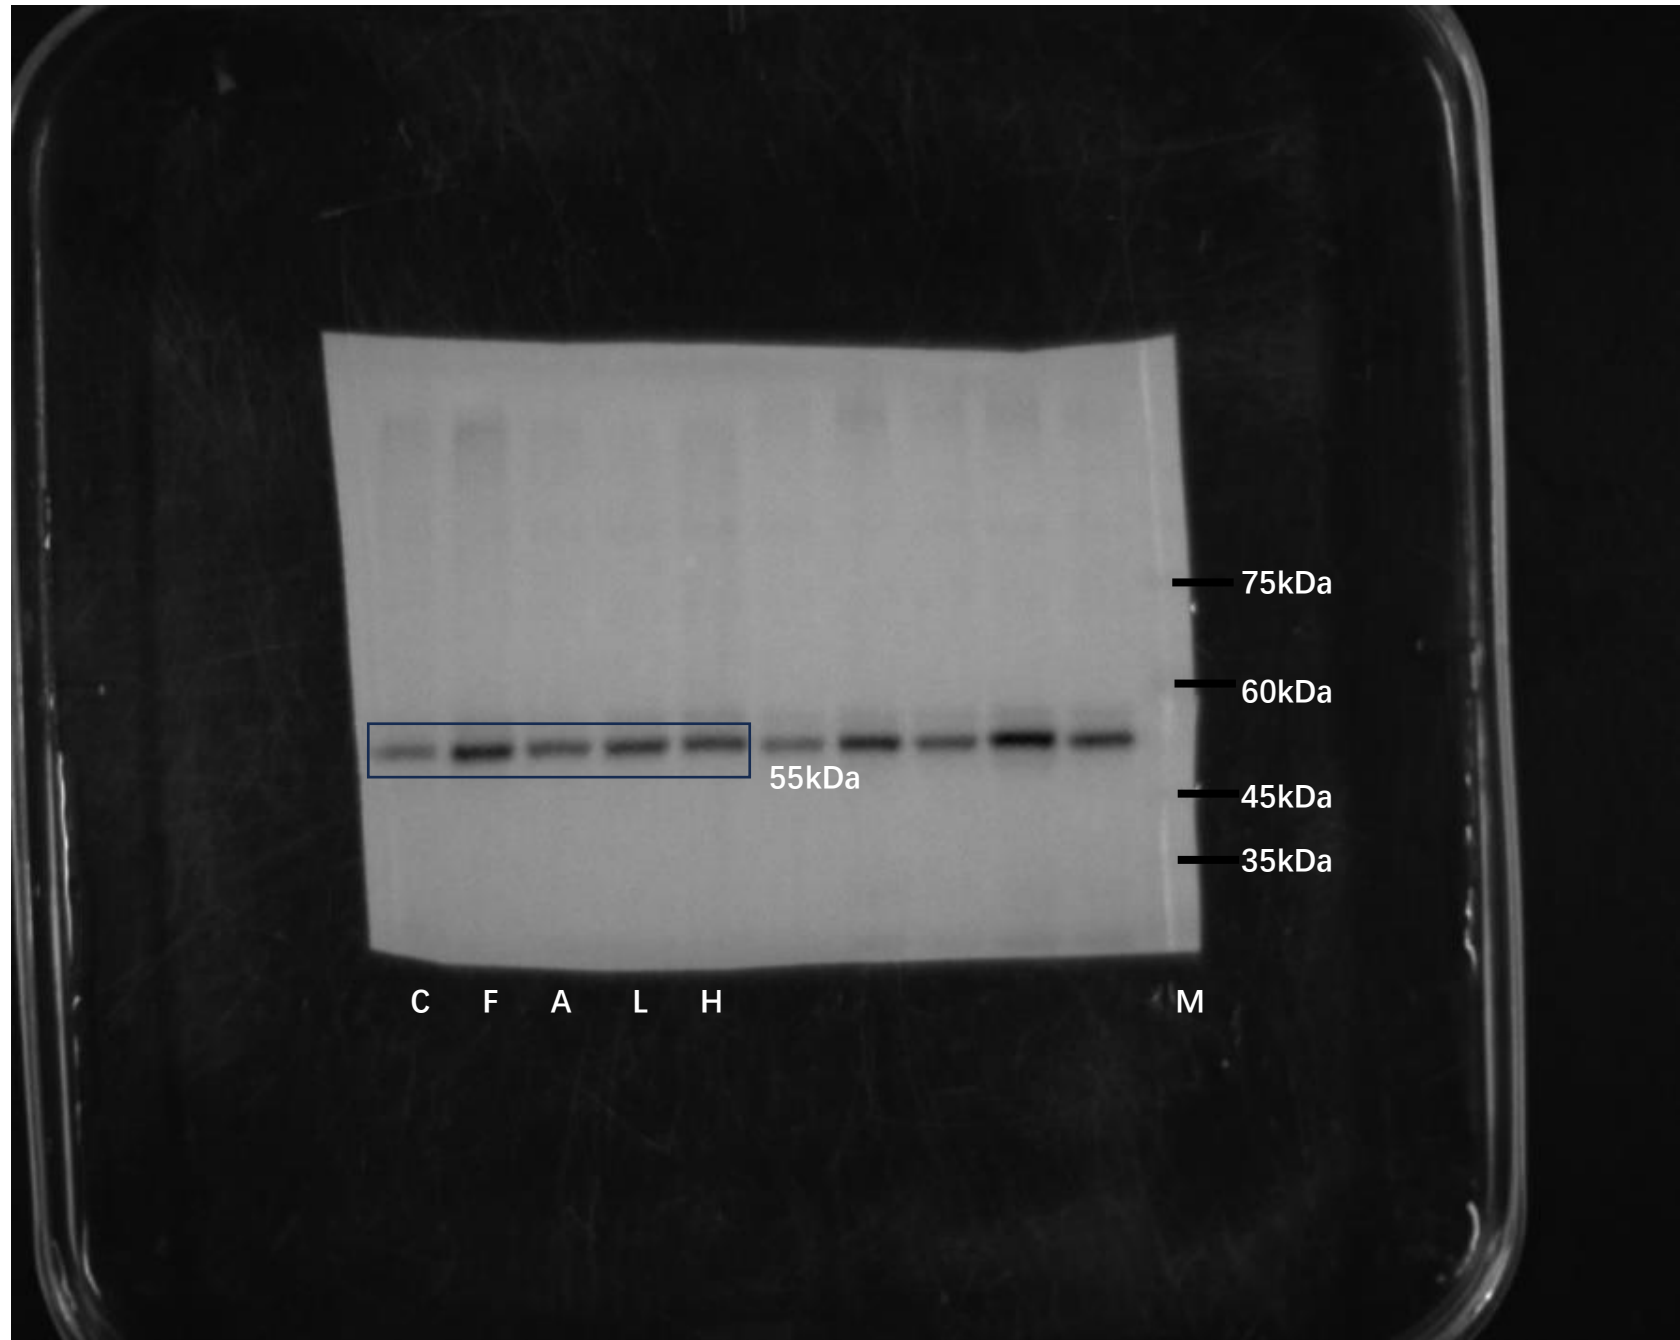

# ACC1

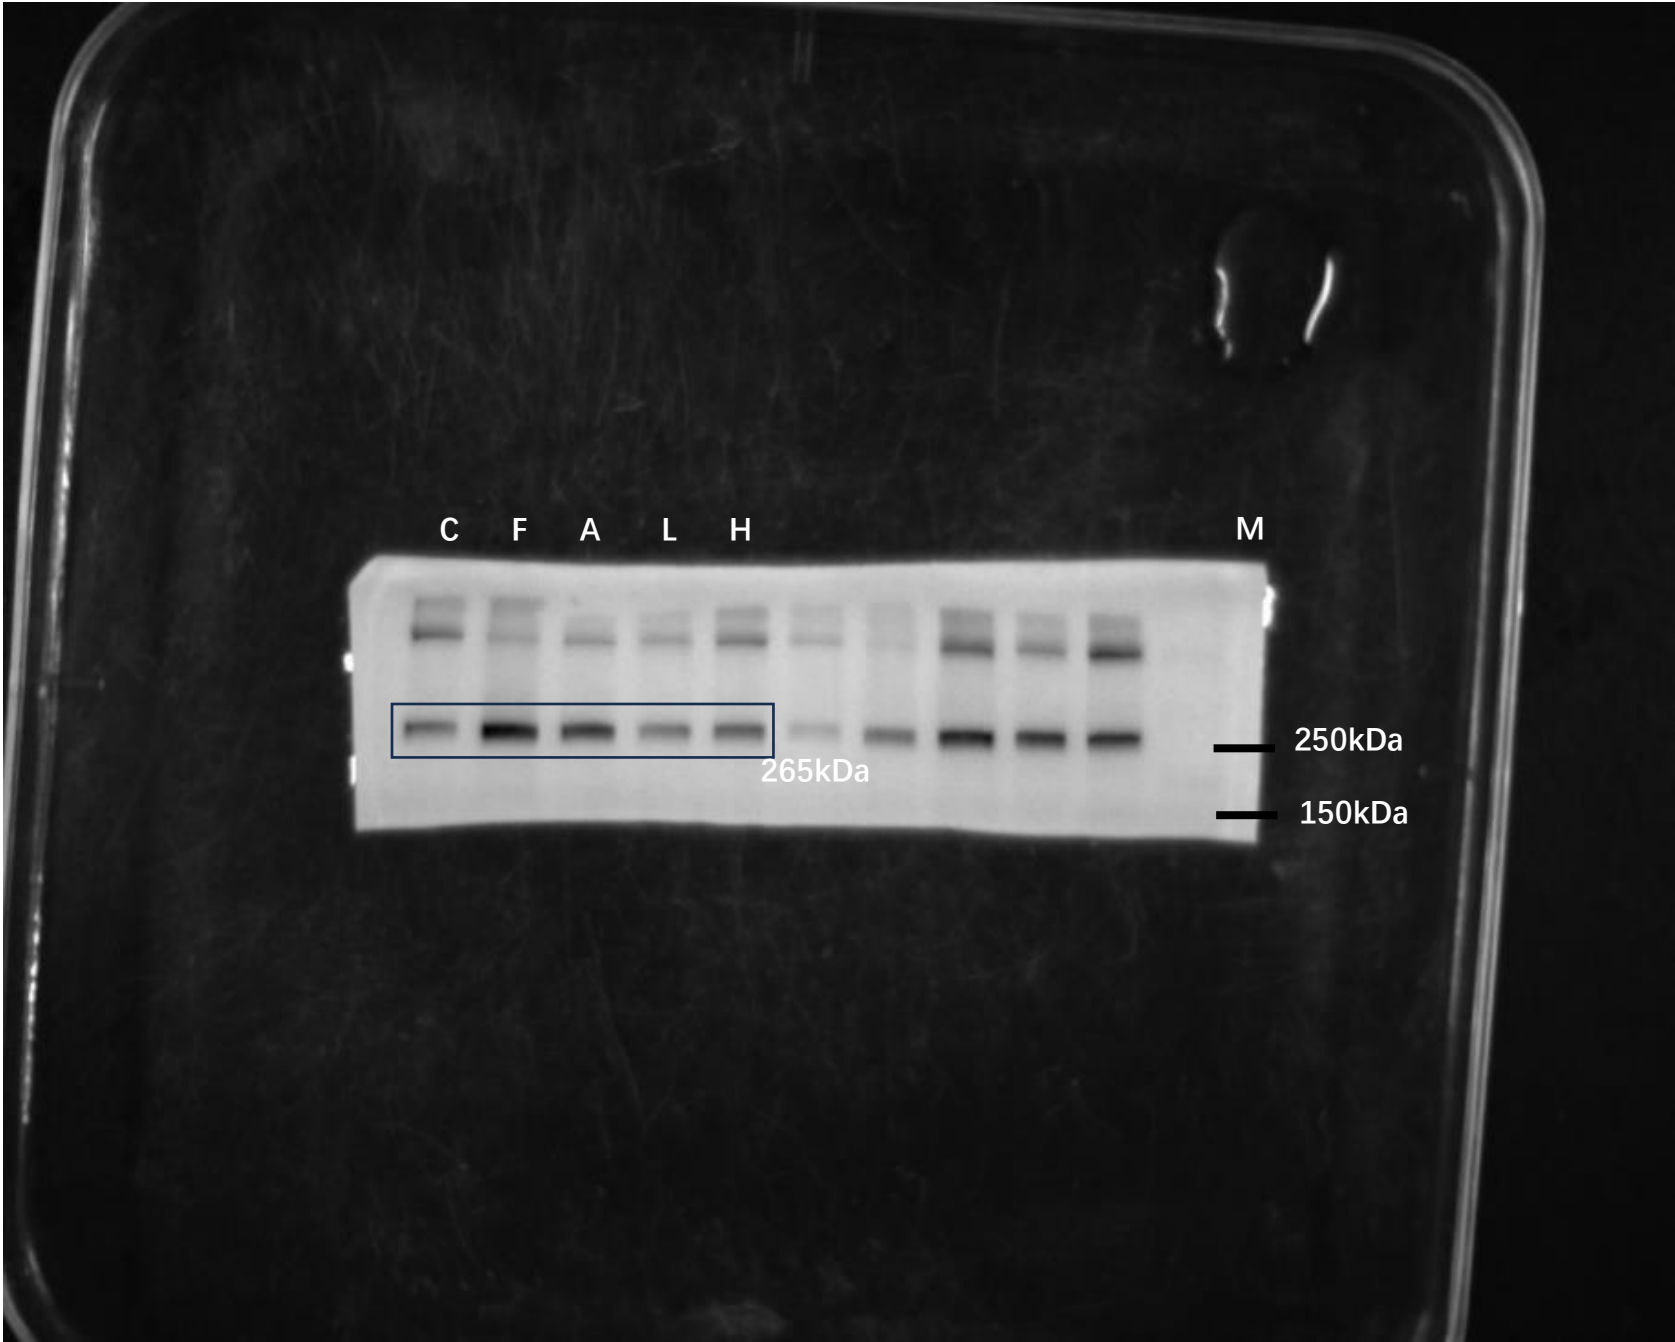

# PPAR $\alpha$

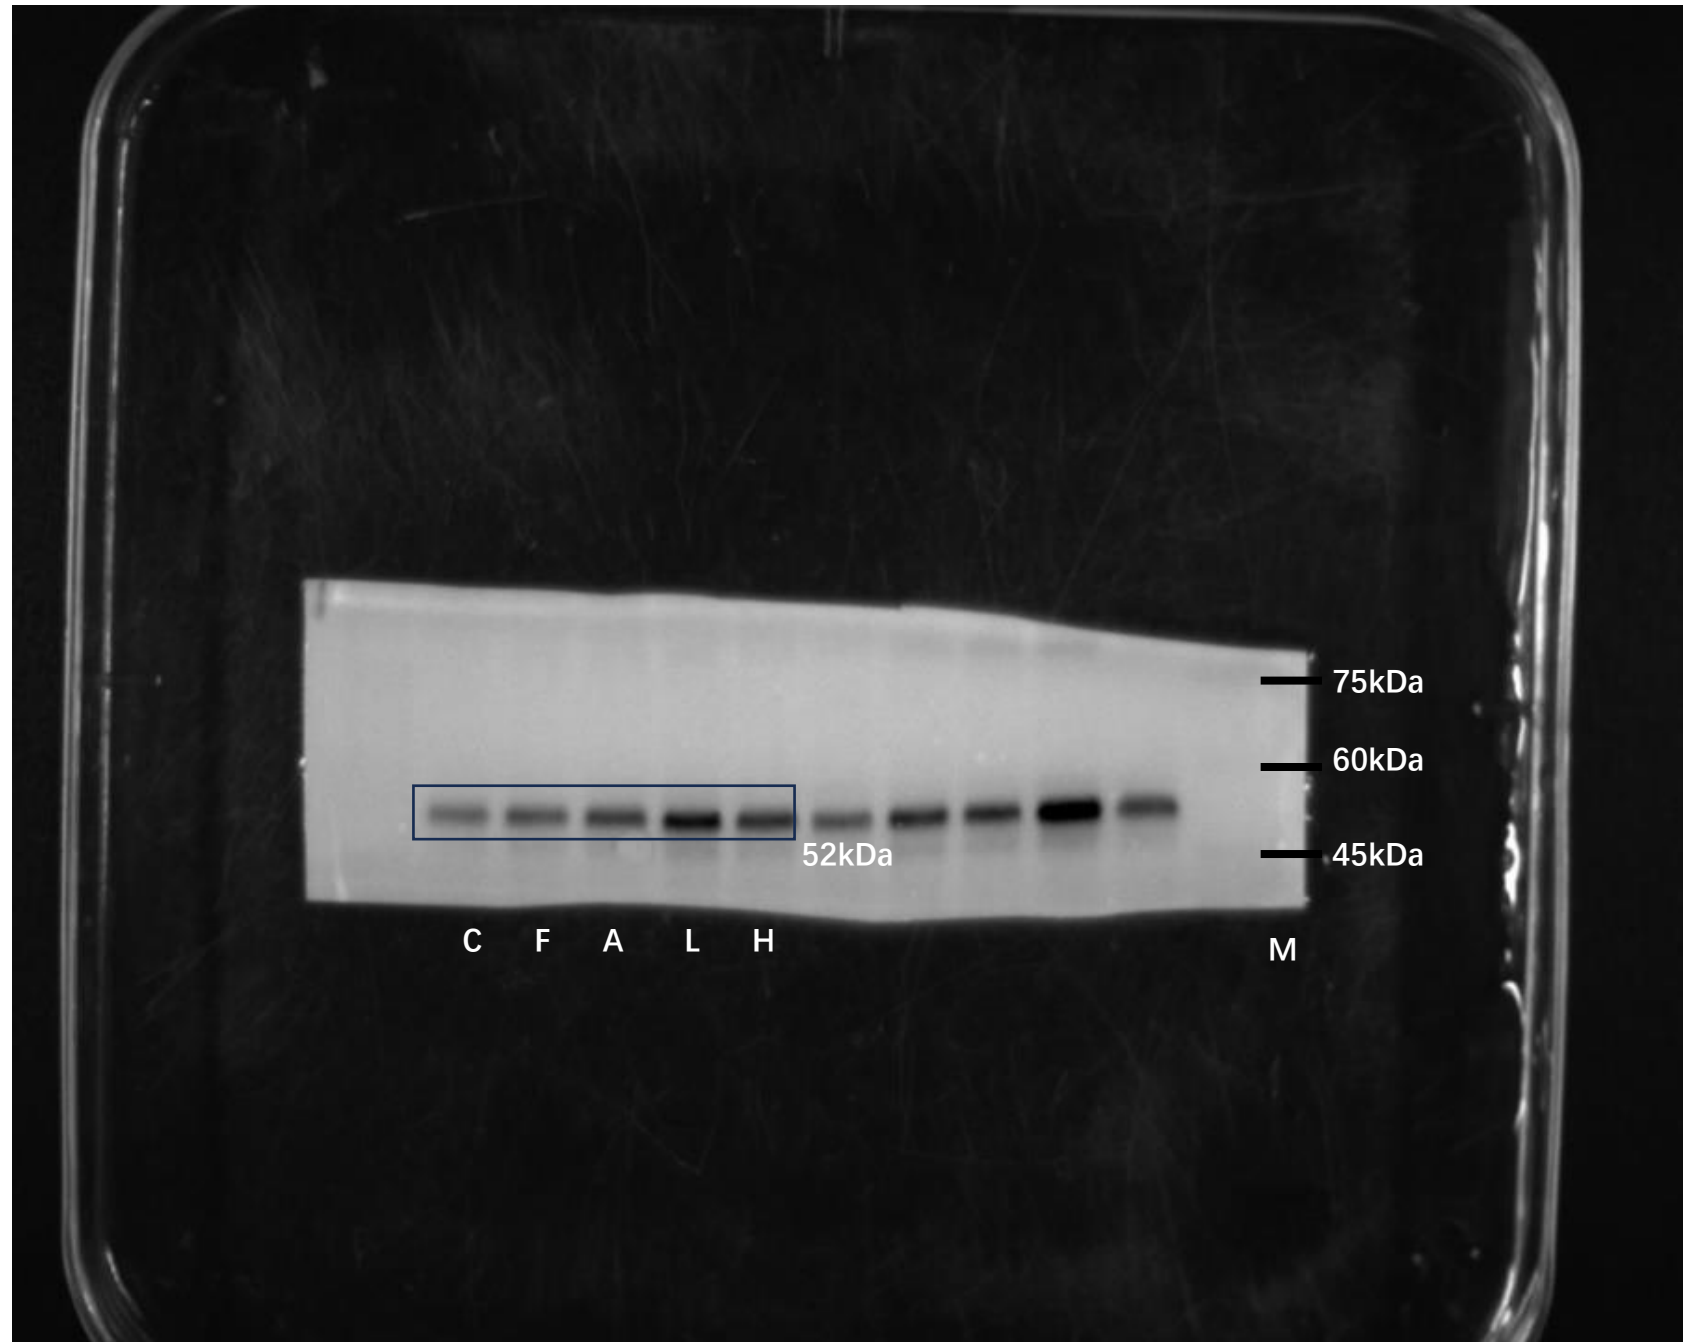

# CPT-1 $\alpha$

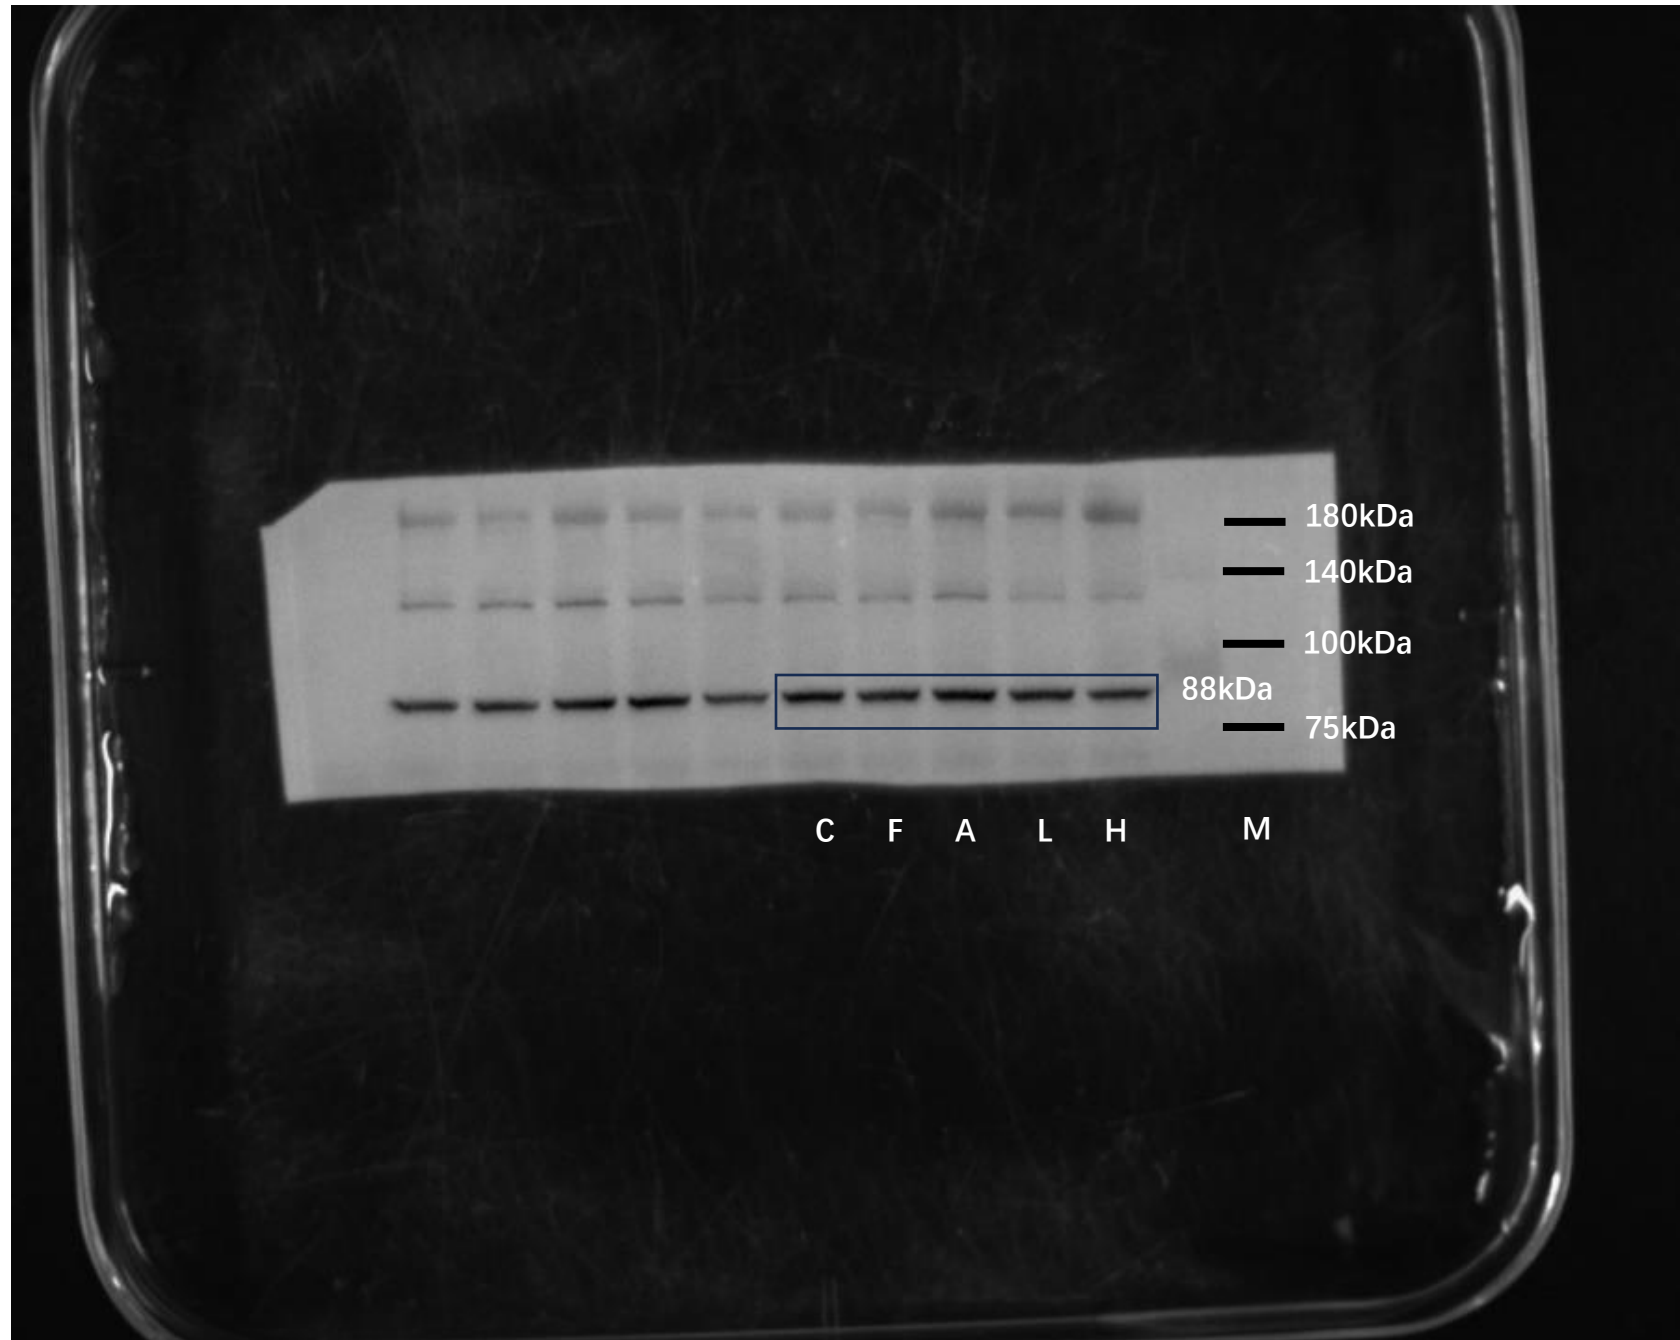

# PEPCK

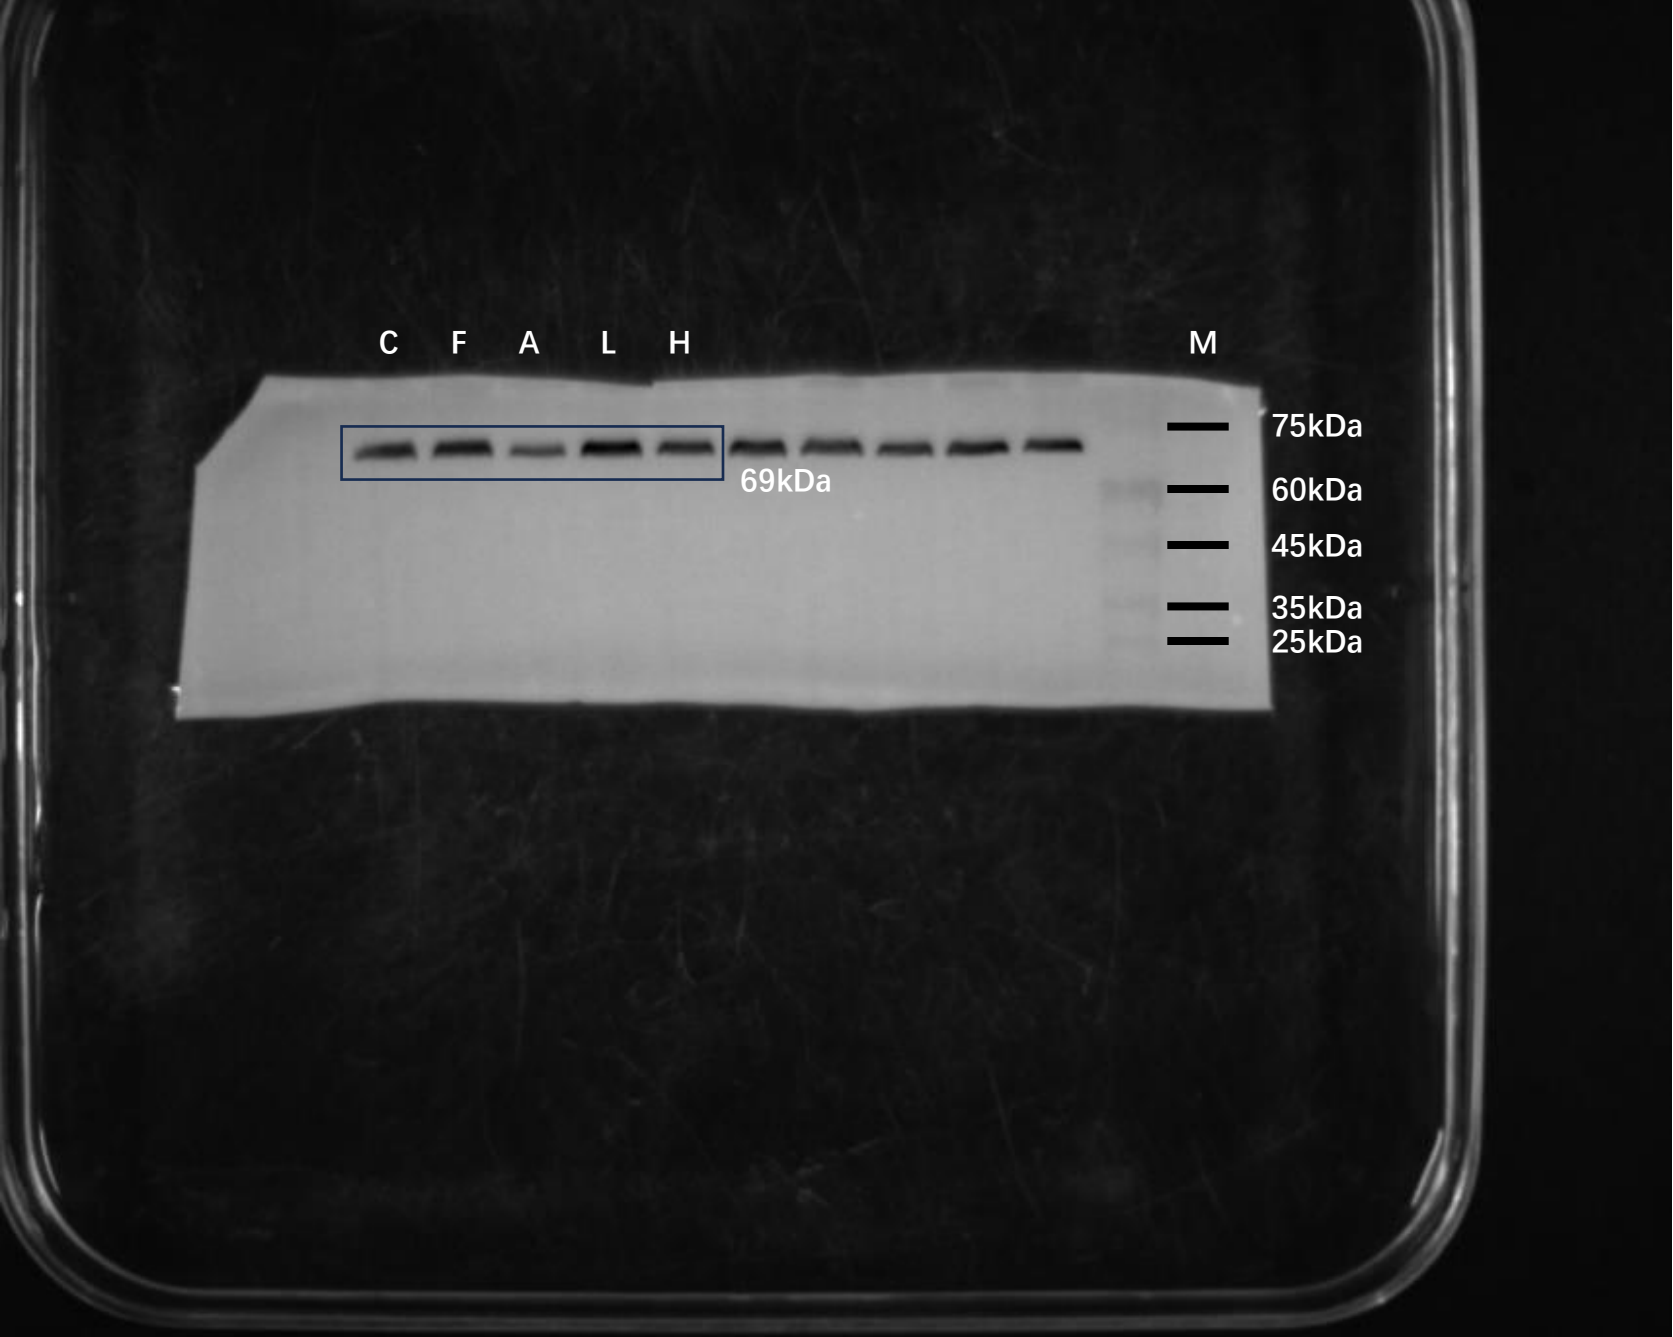

$\beta$ -actin

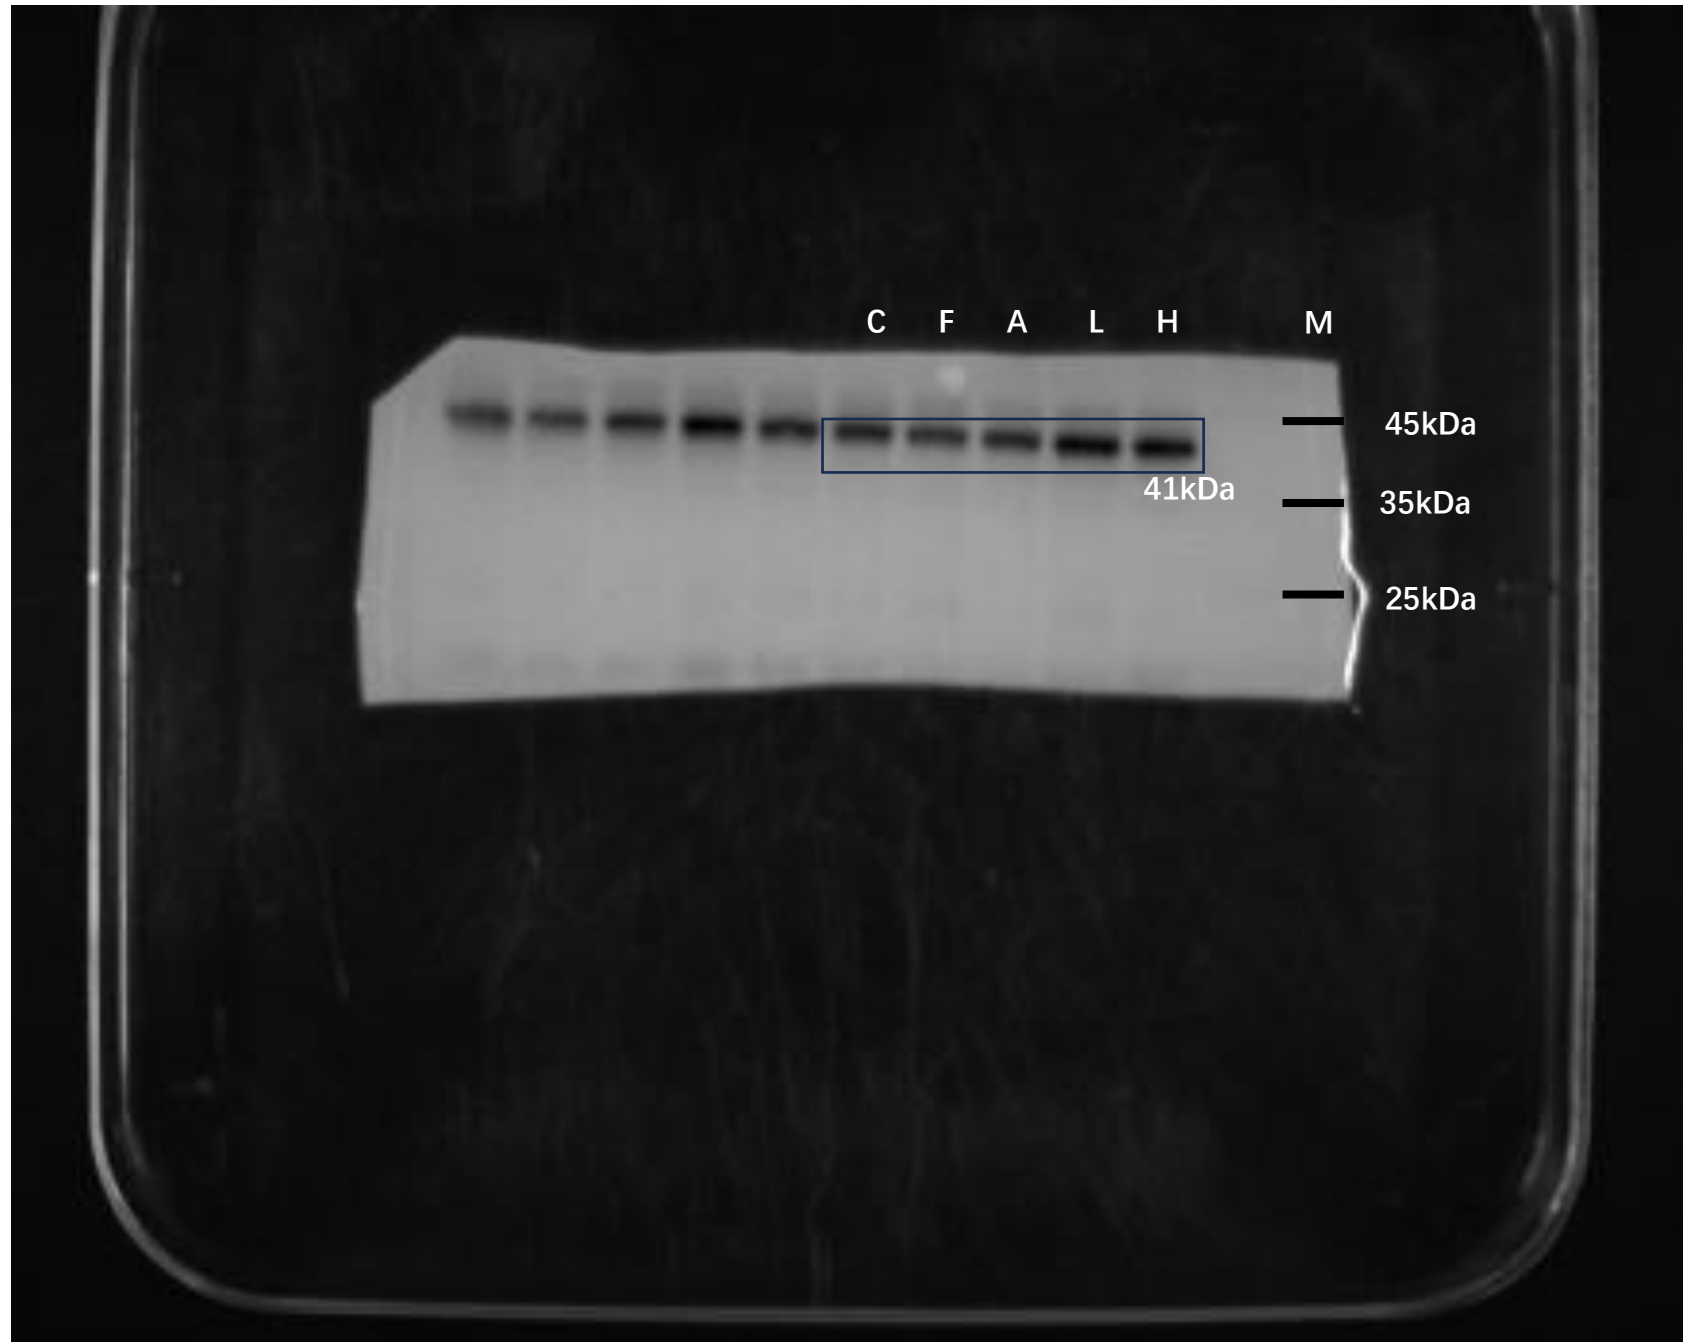

Supplement: d3fo05665a1.pdf [file d3fo05665a1.pdf]
